# Supplementary material
Source: PubMed Central journal article supplement (PMC434448)
Supplement: nar_32_10_3212__1.pdf [file nar_32_10_3212__1.pdf]

## Supplementary data

**Sensing complex regulatory networks by conformationally controlled hairpin ribozymes**

S. Hani Najafi-Shoushtari, Günter Mayer and Michael Famulok

*Kekulé Institut für Organische Chemie und Biochemie, University of Bonn, Gerhard-Domagk-Strasse 1, 53121 Bonn, Germany. E-mail: [m.famulok@uni-bonn.de](mailto:m.famulok@uni-bonn.de)*

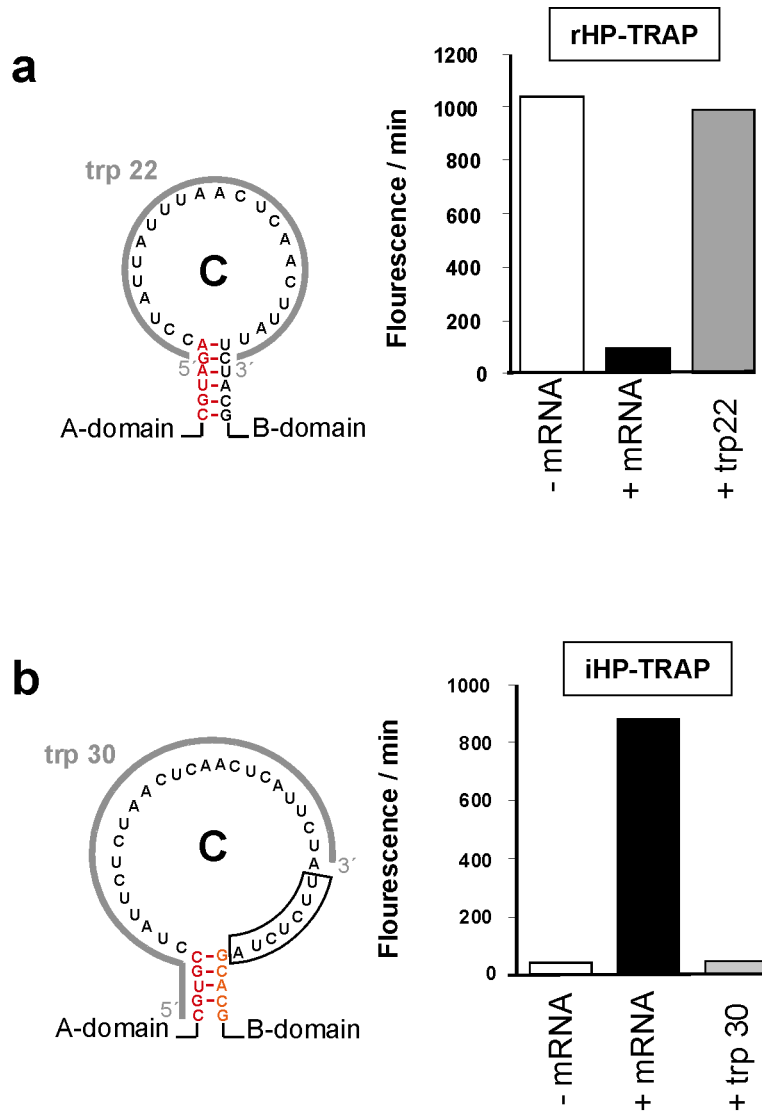

**Fig. 1S** Domain specific deactivation or activation of rHP-TRAP and iHP-TRAP by trp 22 and trp 30. (a) Annealing to the unpaired domain C loop alone cannot cause inhibition since it is not able to trigger the extended conformation. Only TCD co-annealing (black letters show the mRNA annealing region) can convert the stem loop structure of domain C into an RNA duplex as required for ribozyme inhibition. (b) trp 30 annealing to the TCD domain of iHP-TRAP seems to inhibit the formation of an active conformation, as expected. It triggers an extended conformation by distortion of the TCD domain required for half-pseudo-knot formation.

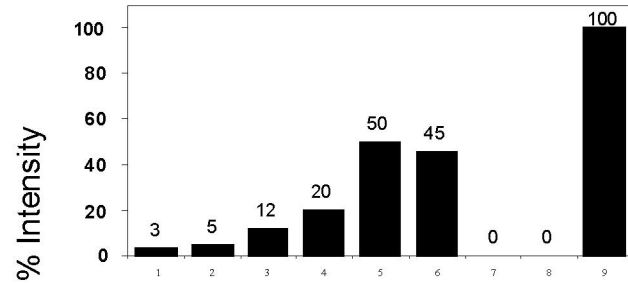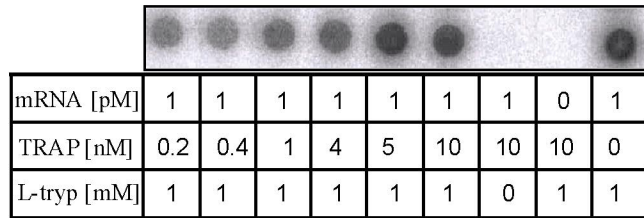

**Fig. 2S** Dot blot analysis of mRNA-TRAP binding.

Najafi et al. Supplementary Table S

Table S

| Ribozyme | Turnover [ $\text{min}^{-1}$ ] |        |
|----------|--------------------------------|--------|
|          | no mRNA                        | + mRNA |
| rHP-TRAP | 0.16                           | 0.02   |
| iHP-TRAP | n.d.                           | 0.23   |

n.d.: not detectable.
